# Supplementary material for: An electrostatic selection mechanism controls sequential kinase signaling downstream of the T cell receptor
Source: eLife journal article supplement (doi:10.7554/elife.20105), 2016-10-04
Supplement: supp [file elife-20105-supp-v1.zip]

Archive with 22 entries (22 files):
- elife_poa_e20105_Figure_7_figure_supplement_7.pdf
- elife_poa_e20105_Figure_7_figure_supplement_6.pdf
- elife_poa_e20105_Figure_8_figure_supplement_1.pdf
- elife_poa_e20105_Figure_6_figure_supplement_1.pdf
- elife_poa_e20105_Figure_7_figure_supplement_1.pdf
- elife_poa_e20105_Figure_7_figure_supplement_5.pdf
- elife_poa_e20105_Figure_5_figure_supplement_4.pdf
- elife_poa_e20105_Figure_7_figure_supplement_4.pdf
- elife_poa_e20105_Figure_3_figure_supplement_2.xlsx
- elife_poa_e20105_Figure_5_figure_supplement_5.pdf
- elife_poa_e20105_Figure_10_figure_supplement_1.pdf
- elife_poa_e20105_Figure_5_figure_supplement_1.pdf
- elife_poa_e20105_Figure_7_figure_supplement_8.pdf
- elife_poa_e20105_Figure_7_figure_supplement_9.pdf
- elife_poa_e20105_Figure_9_figure_supplement_1.pdf
- elife_poa_e20105_Figure_3_figure_supplement_3.pdf
- elife_poa_e20105_Figure_5_figure_supplement_2.pdf
- elife_poa_e20105_Figure_7_figure_supplement_2.pdf
- elife_poa_e20105_Figure_7_figure_supplement_3.pdf
- elife_poa_e20105_Figure_9_figure_supplement_2.pdf
- elife_poa_e20105_Figure_5_figure_supplement_3.pdf
- elife_poa_e20105_Figure_3_figure_supplement_1.xlsx
