# Supplementary material for: An electrostatic selection mechanism controls sequential kinase signaling downstream of the T cell receptor
Source: eLife journal article supplement (doi:10.7554/elife.20105), 2016-10-04

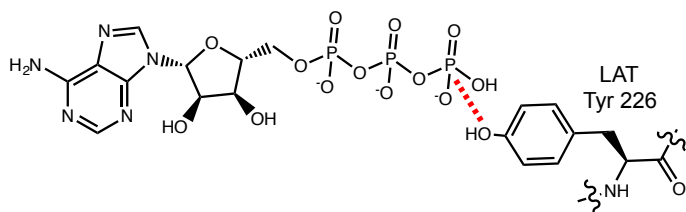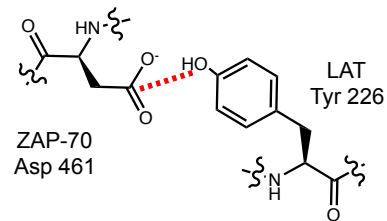

distance between LAT Tyr 226 OH  
and ATP Py less than 6 Å

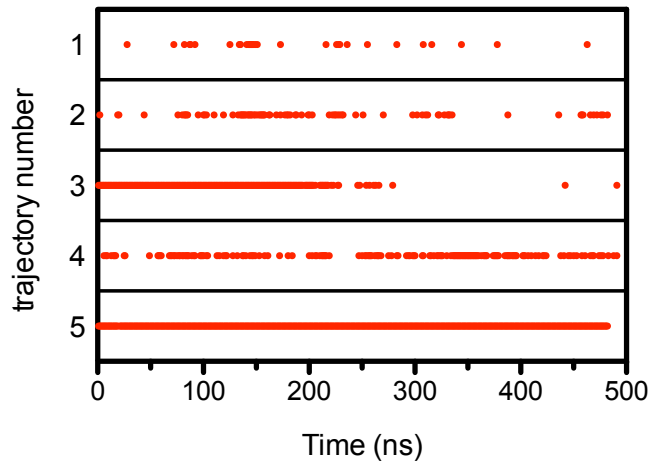

distance between LAT Tyr 226 OH  
and ZAP-70 Asp 461 Cy less than 4 Å

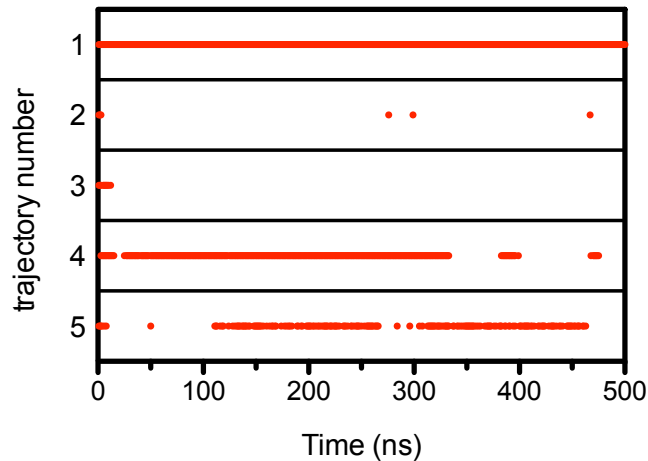

Supplement: supp [file elife-20105-supp-v1.zip › elife_poa_e20105_Figure_7_figure_supplement_3.pdf]
