# Supplementary material for: An electrostatic selection mechanism controls sequential kinase signaling downstream of the T cell receptor
Source: eLife journal article supplement (doi:10.7554/elife.20105), 2016-10-04

- phosphorylation by ZAP-70 (wild-type)
- phosphorylation by ZAP-70 (R514A)
- phosphorylation by ZAP-70 (R514E)

WT    E A E E V E E E G A P <sup>226</sup> D **Y** E N L <sup>231</sup> Q E L N  
 E231A    E A E E V E E E G A P <sup>226</sup> D **Y** E N L Q **A** L N  
 E231K    E A E E V E E E G A P <sup>226</sup> D **Y** E N L Q **K** L N

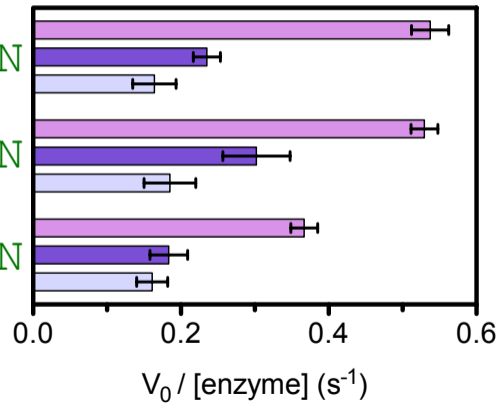

Supplement: supp [file elife-20105-supp-v1.zip › elife_poa_e20105_Figure_7_figure_supplement_9.pdf]
