# Supplementary material for: An electrostatic selection mechanism controls sequential kinase signaling downstream of the T cell receptor
Source: eLife journal article supplement (doi:10.7554/elife.20105), 2016-10-04
Supplement: supp [file elife-20105-supp-v1.zip › elife_poa_e20105_Figure_10_figure_supplement_1.pdf]

+ LAT

+ TCR $\zeta$ 

+ Lck

| ZAP-70 | ZAP-70(AAMA) | ZAP-70(RGMK) | Syk | Syk(KKMK) | Lck | ZAP-70 | ZAP-70(AAMA) | ZAP-70(RGMK) | Syk | Syk(KKMK) | Lck | ZAP-70(WT) | ZAP-70(AAMA) | ZAP-70(RGMK) | Syk | Syk(KKMK) | Lck |
|--------|--------------|--------------|-----|-----------|-----|--------|--------------|--------------|-----|-----------|-----|------------|--------------|--------------|-----|-----------|-----|
|--------|--------------|--------------|-----|-----------|-----|--------|--------------|--------------|-----|-----------|-----|------------|--------------|--------------|-----|-----------|-----|

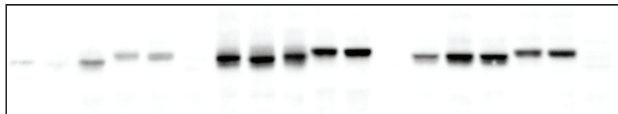 $\alpha$  ZAP-70 (pTyr 319) /  $\alpha$  Syk (pTyr 352)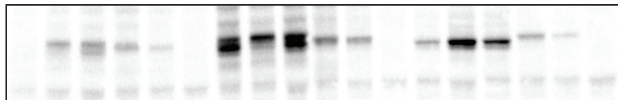 $\alpha$  ZAP-70 (pTyr 493) /  $\alpha$  Syk (pTyr 526)
