# Supplementary material for: An electrostatic selection mechanism controls sequential kinase signaling downstream of the T cell receptor
Source: eLife journal article supplement (doi:10.7554/elife.20105), 2016-10-04
Supplement: supp [file elife_poa_e20105_Figure_3_figure_supplement_1.xlsx]

## Sheet: Sheet1
short peptide name	full peptide name	peptide sequence
LAT Y36	LAT(24-43)	ALCVHCHRLPGSYDSTSSDS
LAT Y45	LAT(33-52, Y36F)	PGSFDSTSSDSLYPRGIQFK
LAT Y64	LAT(52-71, Y70F)	KRPHTVAPWPPAYPPVTSFP
LAT Y70	LAT(58-77)	APWPPAFPPVTSYPPLSQPD
LAT Y110	LAT(98-117)	RRDSDGANSVASYENEEPAC
LAT Y127	LAT(115-134, Y132F)	PACEDADEDEDDYHNPGFLV
LAT Y132	LAT(120-139, Y127F)	ADEDEDDFHNPGYLVVLPDS
LAT Y127/132	LAT(120-139)	ADEDEDDYHNPGYLVVLPDS
LAT Y171	LAT(159-178)	RDSAFSMESIDDYVNVPESG
LAT Y191	LAT(179-198)	ESAEASLDGSREYVNVSQEL
LAT Y226	LAT(214-233)	EAEEVEEEGAPDYENLQELN
LAT Y226F	LAT(214-233, Y226F)	EAEEVEEEGAPDFENLQELN
SLP-76 Y113	SLP-76(103-123)	GGWSSFEEDDYESPNDDQDGE
SLP-76 Y128	SLP-76(118-138)	DDQDGEDDGDYESPNEEEEAP
SLP-76 Y145	SLP-76(135-155)	EEAPVEDDADYEPPPSNDEEA
p38α Y323	p38α(312-330)	HDPDDEPVADPYDQSFESR
TCRζ Y72/83	TCRζ(67-88)	GQNQLYNELNLGRREEYDVLDK
TCRζ Y72	TCRζ(67-88, Y83F)	GQNQLYNELNLGRREEFDVLDK
TCRζ Y83	TCRζ(67-88, Y72F)	GQNQLFNELNLGRREEYDVLDK
TCRζ Y111/123	TCRζ(107-128)	QEGLYNELQKDKMAEAYSEIGM
TCRζ Y111	TCRζ(107-128, Y123F)	QEGLYNELQKDKMAEAFSEIGM
TCRζ Y123	TCRζ(107-128, Y111F)	QEGLFNELQKDKMAEAYSEIGM
TCRζ Y142/153	TCRζ(137-158)	GHDGLYQGLSTATKDTYDALHM
TCRζ Y142	TCRζ(137-158, Y153F)	GHDGLYQGLSTATKDTFDALHM
TCRζ Y153	TCRζ(137-158, Y142F)	GHDGLFQGLSTATKDTYDALHM
TCRζ Y142/153F	TCRζ(137-158, Y142F, Y153F)	GHDGLFQGLSTATKDTFDALHM
