# Supplementary material for: An electrostatic selection mechanism controls sequential kinase signaling downstream of the T cell receptor
Source: eLife journal article supplement (doi:10.7554/elife.20105), 2016-10-04
Supplement: supp [file elife_poa_e20105_Figure_3_figure_supplement_2.xlsx]

## Sheet: Sheet1
short peptide name	full peptide name	peptide sequence
LAT Y127	Gly-LAT(115-134, Y132F)	GPACEDADEDEDDYHNPGFLV
LAT Y132	LAT(120-139, Y127F)	ADEDEDDFHNPGYLVVLPDS
LAT Y171	LAT(159-178)	RDSAFSMESIDDYVNVPESG
LAT Y191	LAT(179-198)	ESAEASLDGSREYVNVSQEL
LAT Y226	LAT(214-233)	EAEEVEEEGAPDYENLQELN
SLP-76 Y113	SLP-76(103-123)	GGWSSFEEDDYESPNDDQDGE
SLP-76 Y128	SLP-76(118-138)	DDQDGEDDGDYESPNEEEEAP
p38α Y323	p38α(312-330)	HDPDDEPVADPYDQSFESR
TCRζ Y111/123	TCRζ(107-128)	QEGLYNELQKDKMAEAYSEIGM
TCRζ Y142/153	TCRζ(137-158)	GHDGLYQGLSTATKDTYDALHM
