# Supplementary figures and images for: An electrostatic selection mechanism controls sequential kinase signaling downstream of the T cell receptor
Source: eLife journal article supplement (doi:10.7554/elife.20105), 2016-10-04

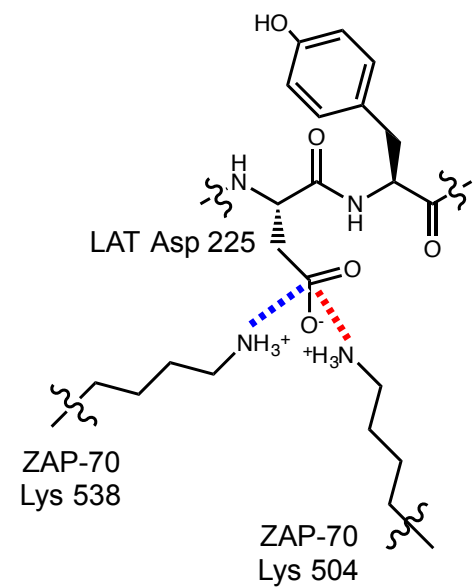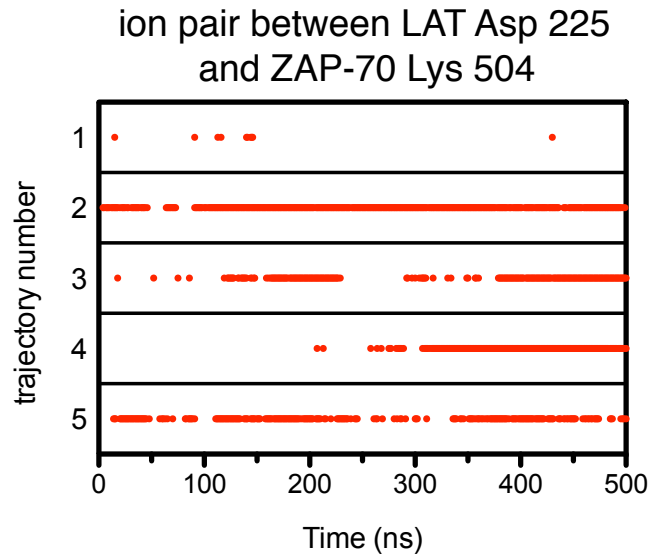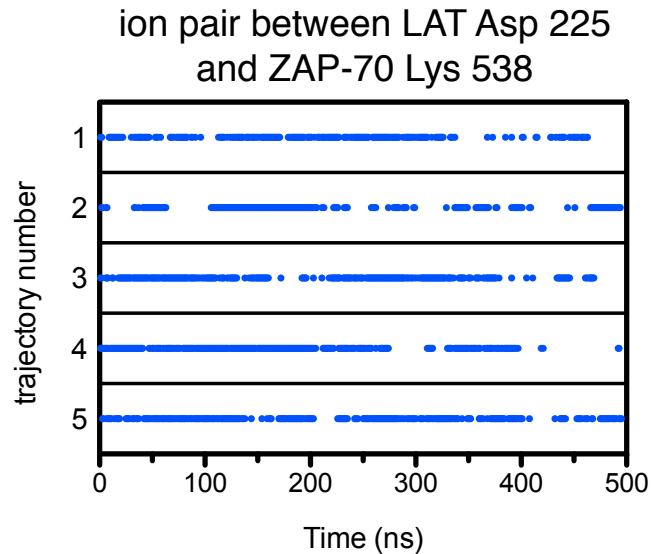

Supplement: supp [file elife-20105-supp-v1.zip]

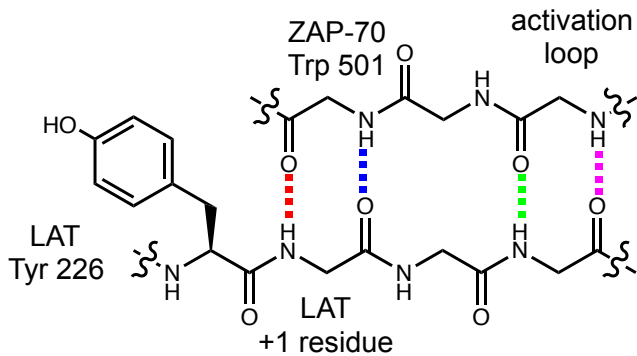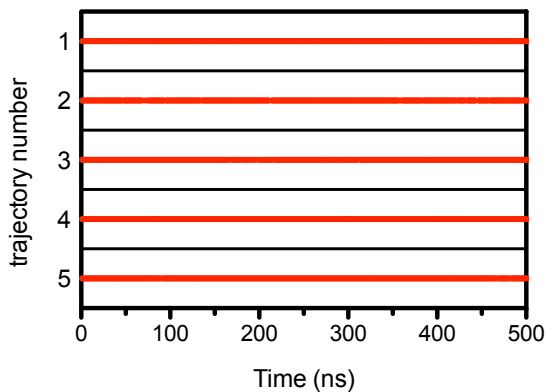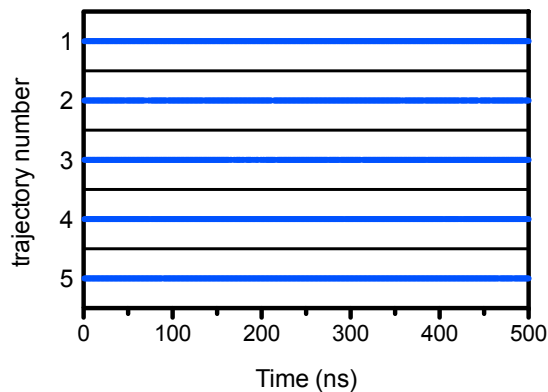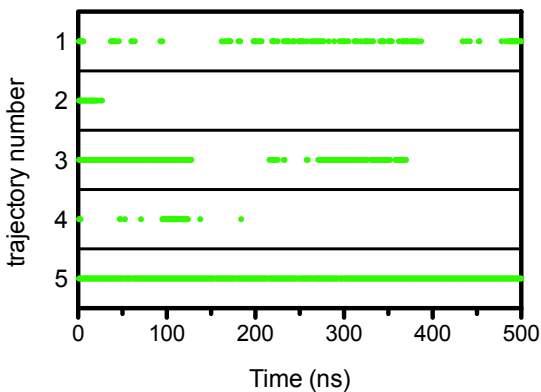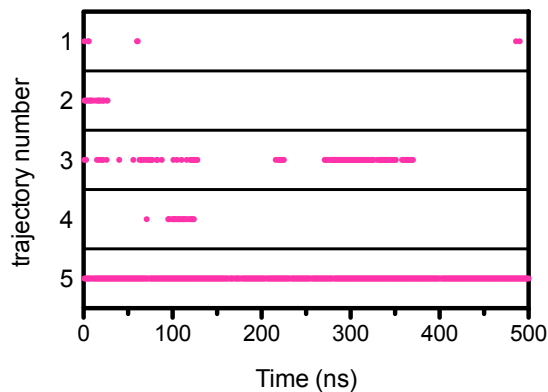

Supplement: supp [file elife-20105-supp-v1.zip]

132

WT ADEDEDDFHNPG**Y**LVVLPDSG131D ADEDEDDFHN**P****D****Y**LVVLPDS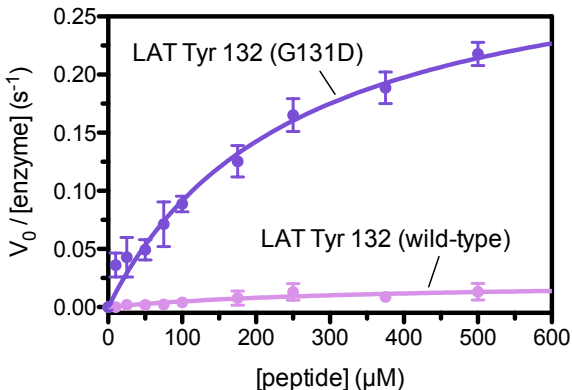

Supplement: supp [file elife-20105-supp-v1.zip]

replicate 1 vs. 2

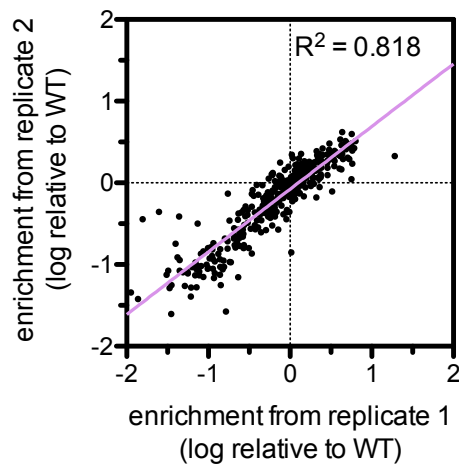

replicate 1 vs. 3

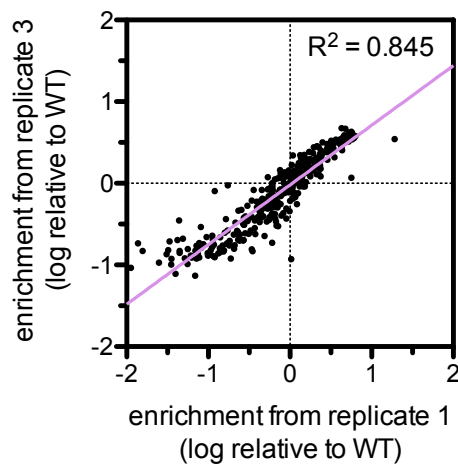

replicate 1 vs. 4

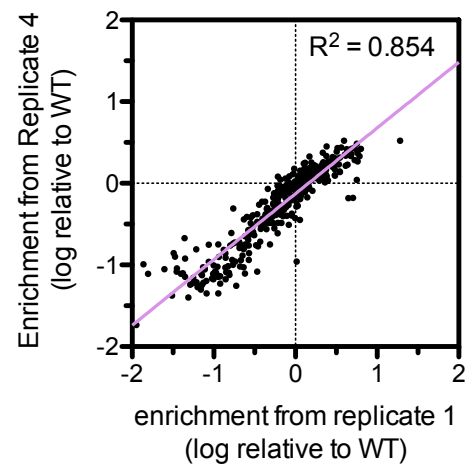

replicate 2 vs. 3

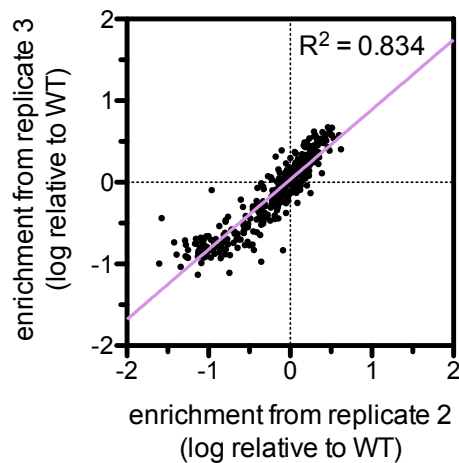

replicate 2 vs. 4

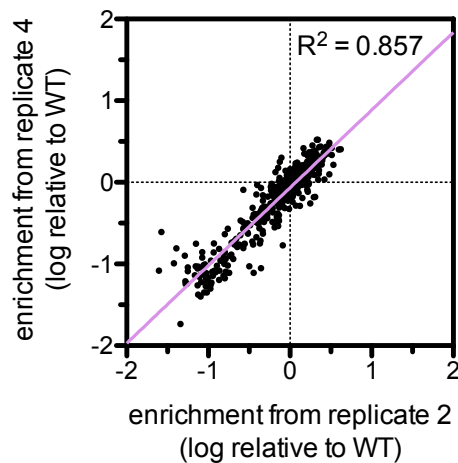

replicate 3 vs. 4

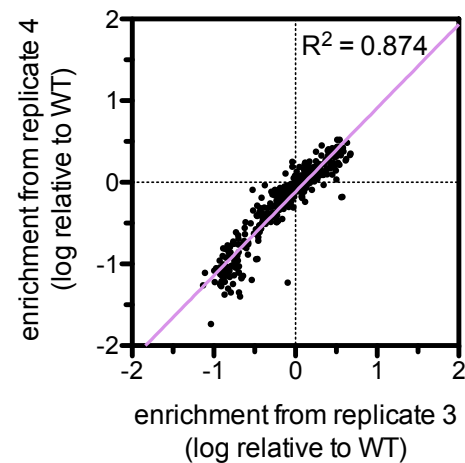

Supplement: supp [file elife-20105-supp-v1.zip]

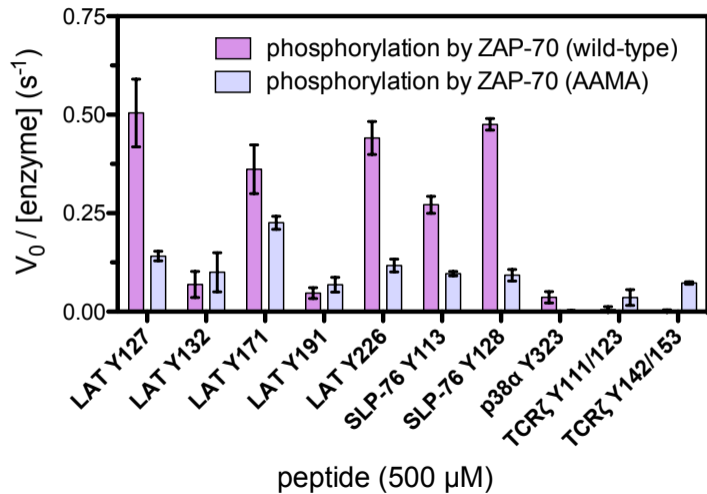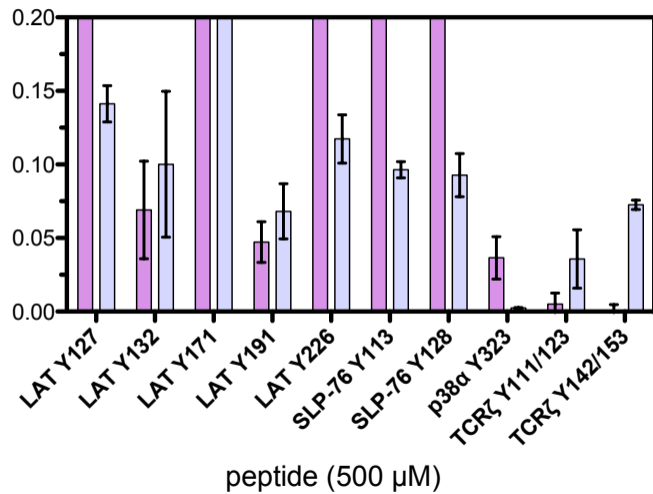

Supplement: supp [file elife-20105-supp-v1.zip › elife_poa_e20105_Figure_7_figure_supplement_7.pdf]

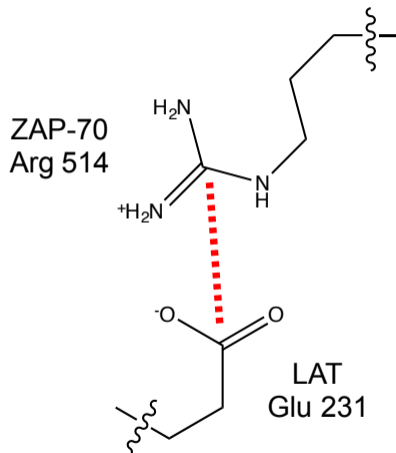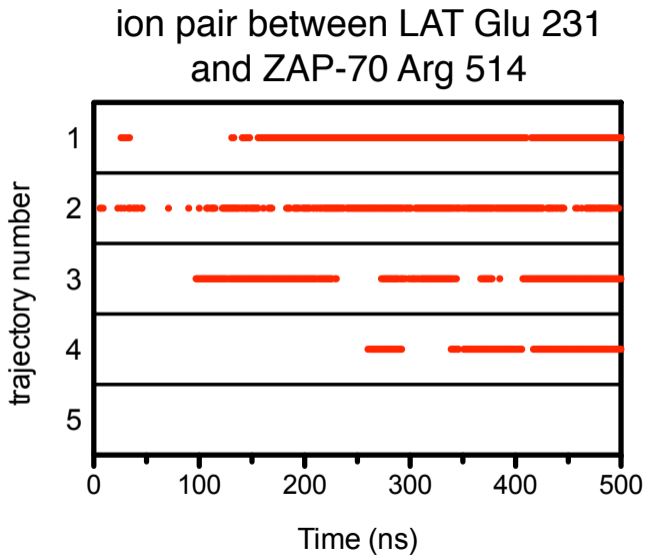

Supplement: supp [file elife-20105-supp-v1.zip › elife_poa_e20105_Figure_7_figure_supplement_6.pdf]

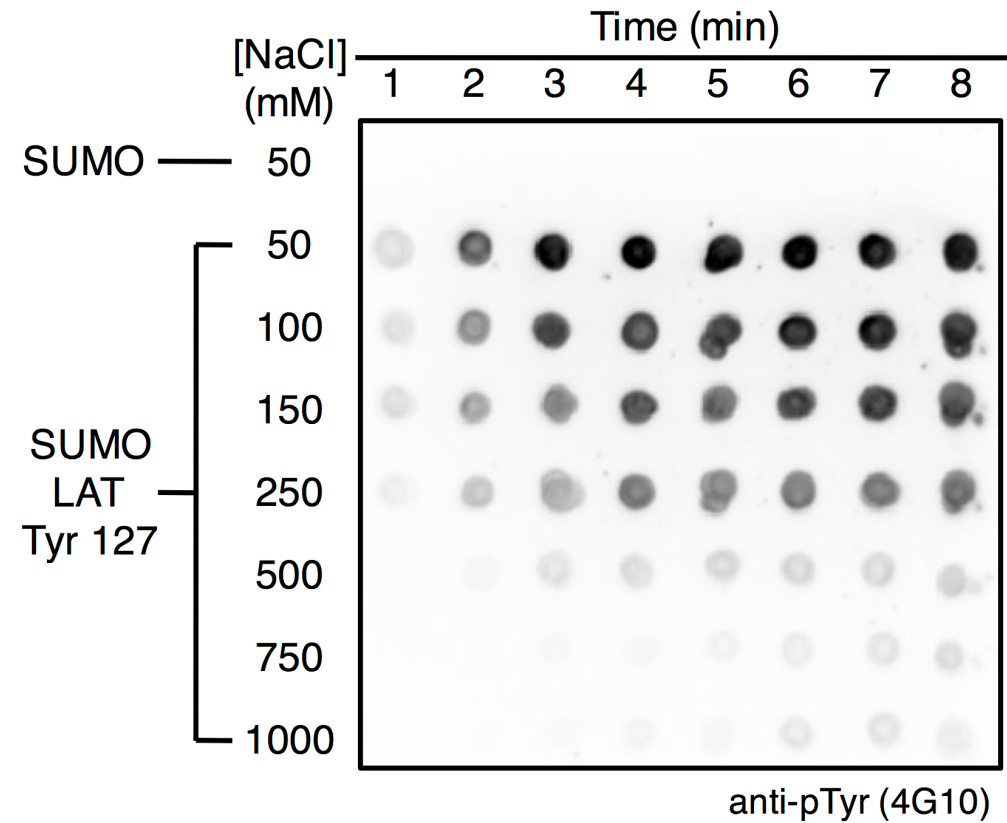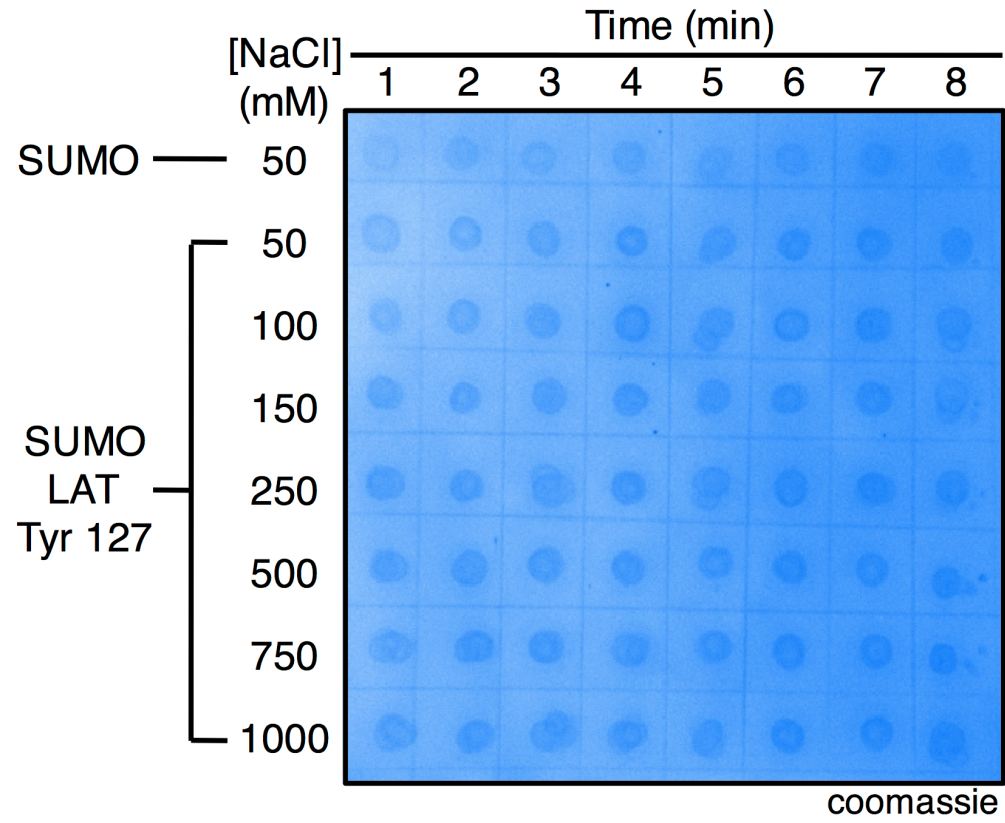

Supplement: supp [file elife-20105-supp-v1.zip › elife_poa_e20105_Figure_8_figure_supplement_1.pdf]

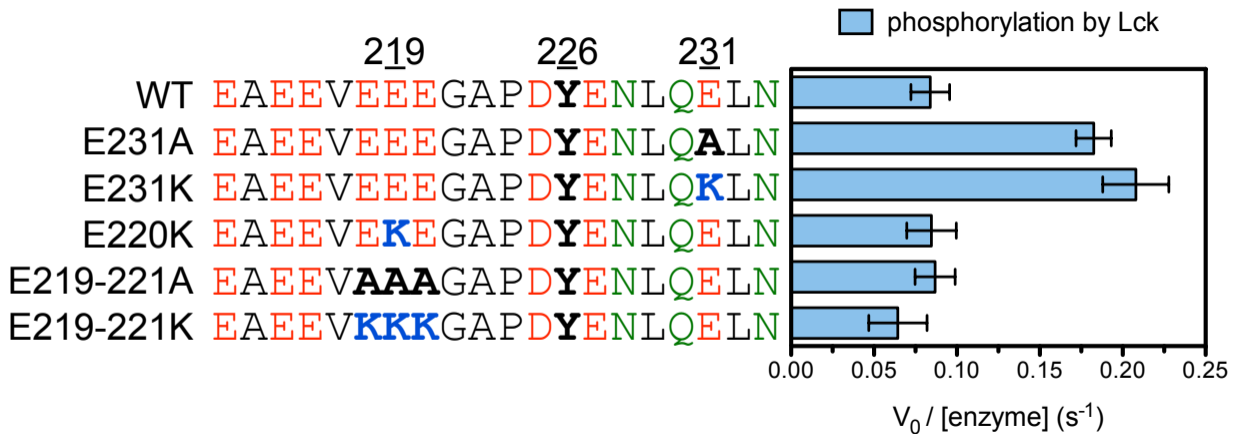

Supplement: supp [file elife-20105-supp-v1.zip › elife_poa_e20105_Figure_6_figure_supplement_1.pdf]

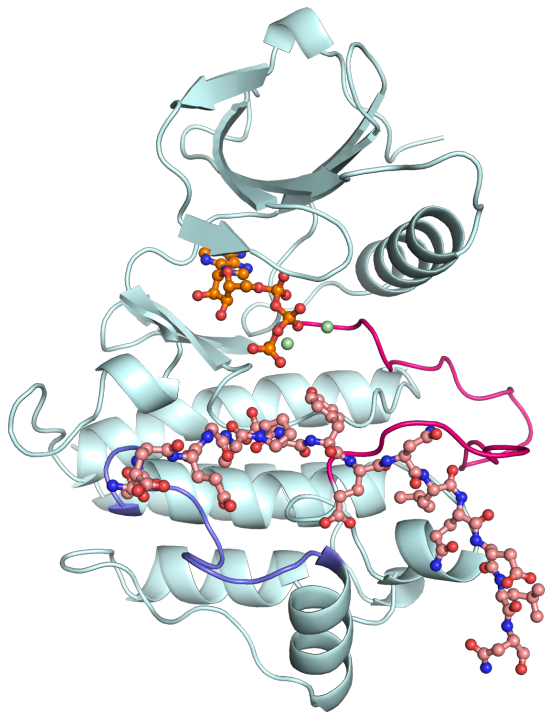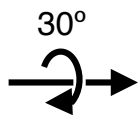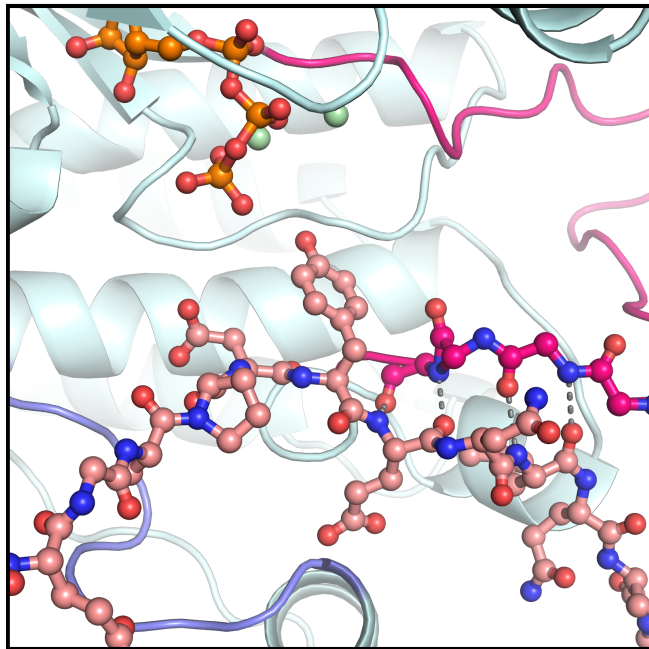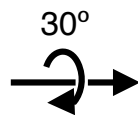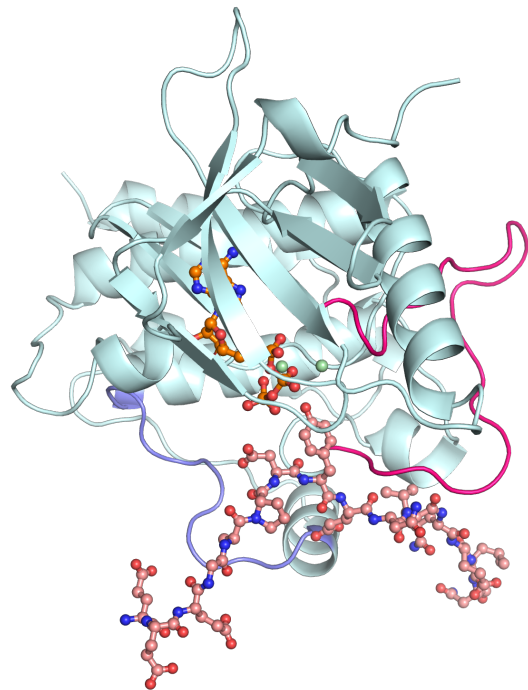

Supplement: supp [file elife-20105-supp-v1.zip › elife_poa_e20105_Figure_7_figure_supplement_1.pdf]

# frequency of ion pairs between LAT Glu 219, 220, & 221 and ZAP-70 lysines

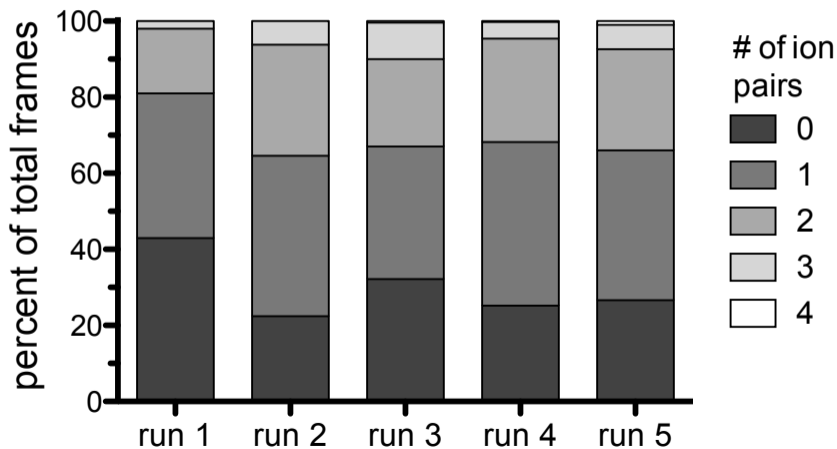

Supplement: supp [file elife-20105-supp-v1.zip › elife_poa_e20105_Figure_7_figure_supplement_5.pdf]

43  
Mammals

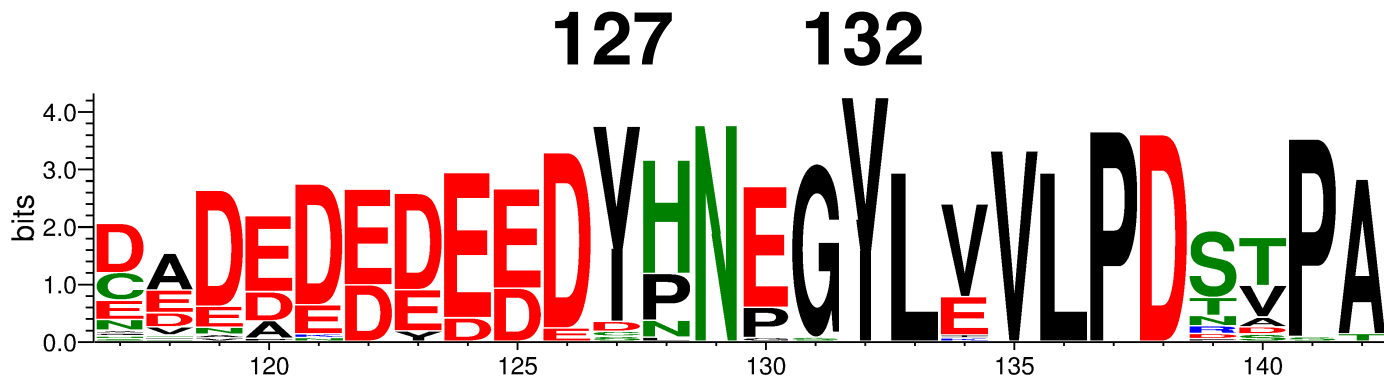

16  
Fish/Reptiles

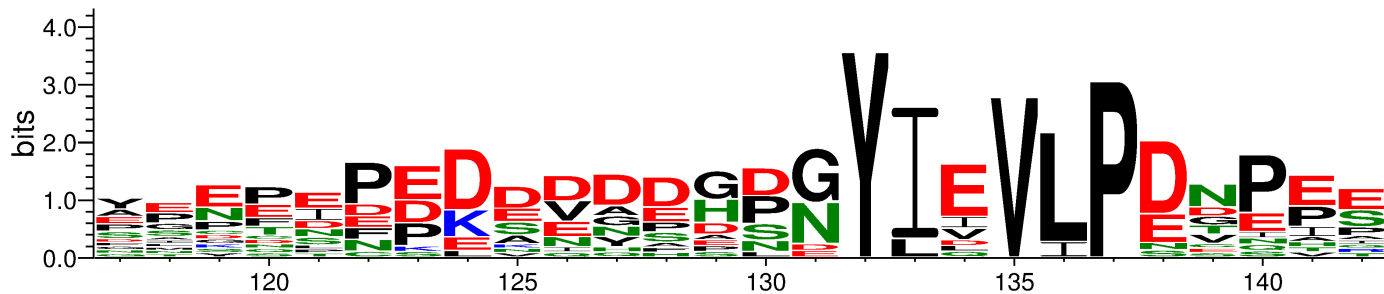

Supplement: supp [file elife-20105-supp-v1.zip › elife_poa_e20105_Figure_5_figure_supplement_5.pdf]

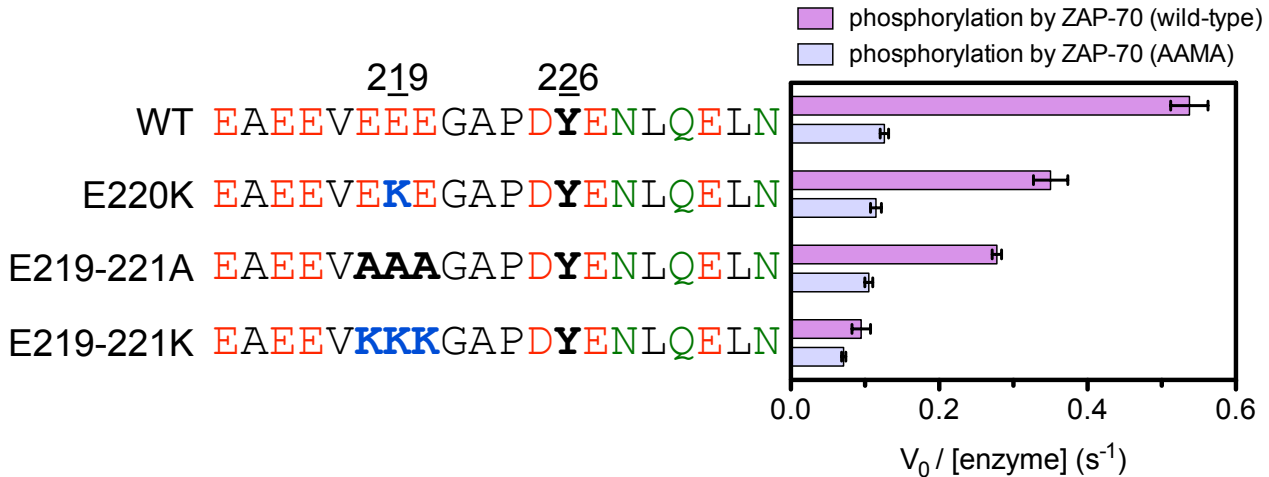

Supplement: supp [file elife-20105-supp-v1.zip › elife_poa_e20105_Figure_7_figure_supplement_8.pdf]

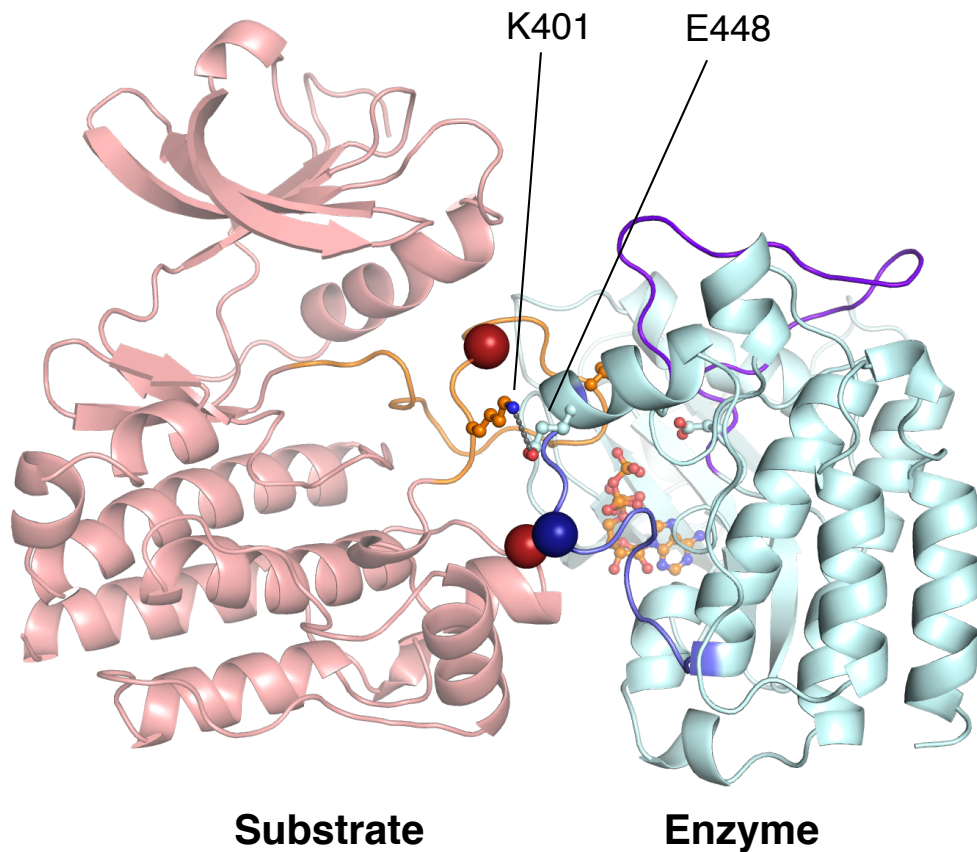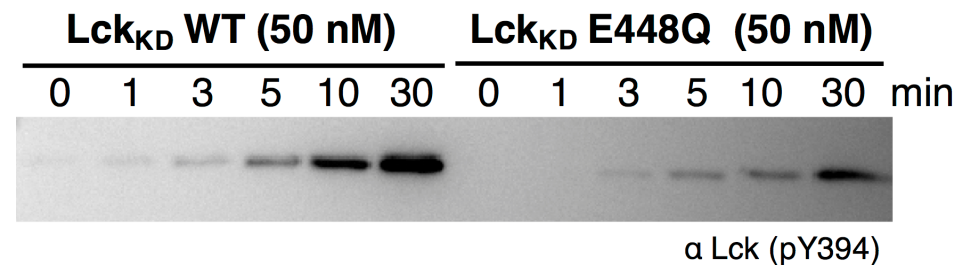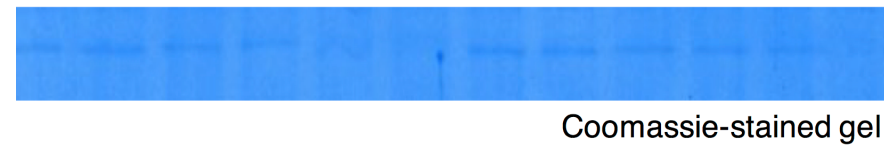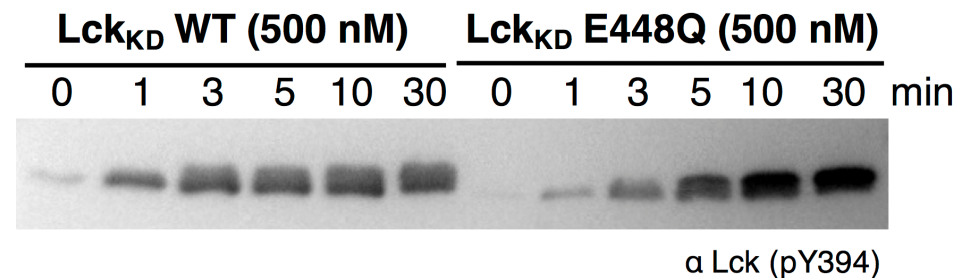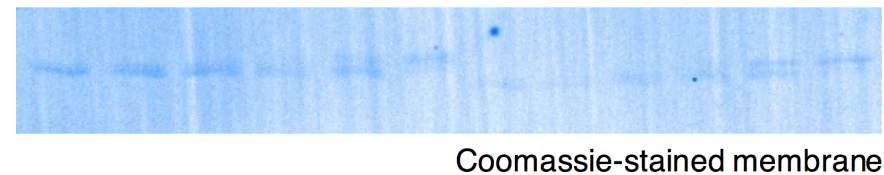

Supplement: supp [file elife-20105-supp-v1.zip › elife_poa_e20105_Figure_9_figure_supplement_1.pdf]

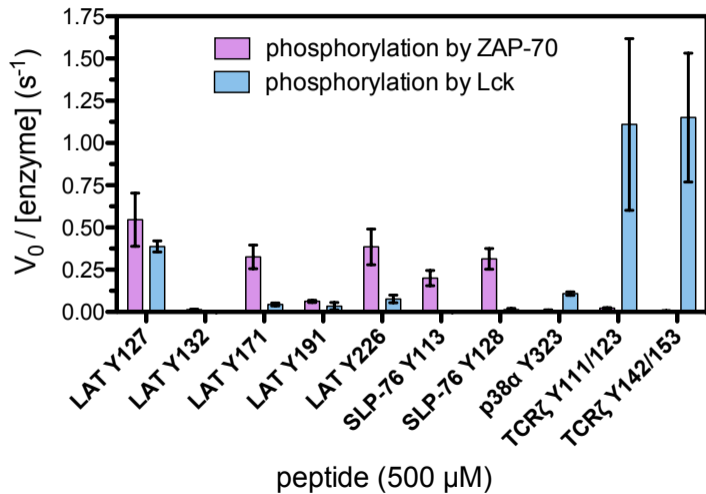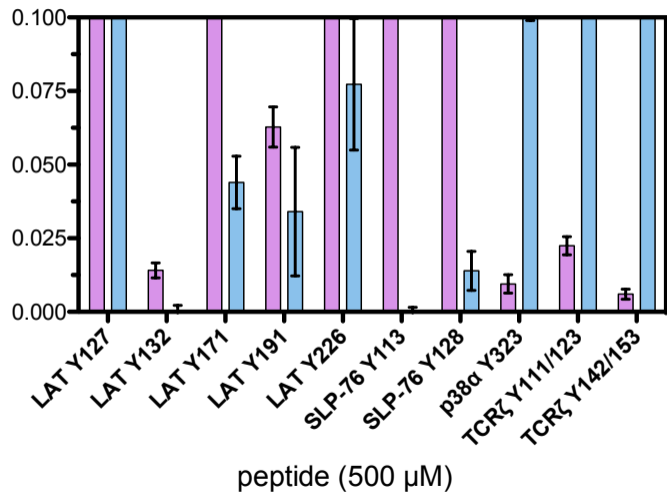

Supplement: supp [file elife-20105-supp-v1.zip › elife_poa_e20105_Figure_3_figure_supplement_3.pdf]

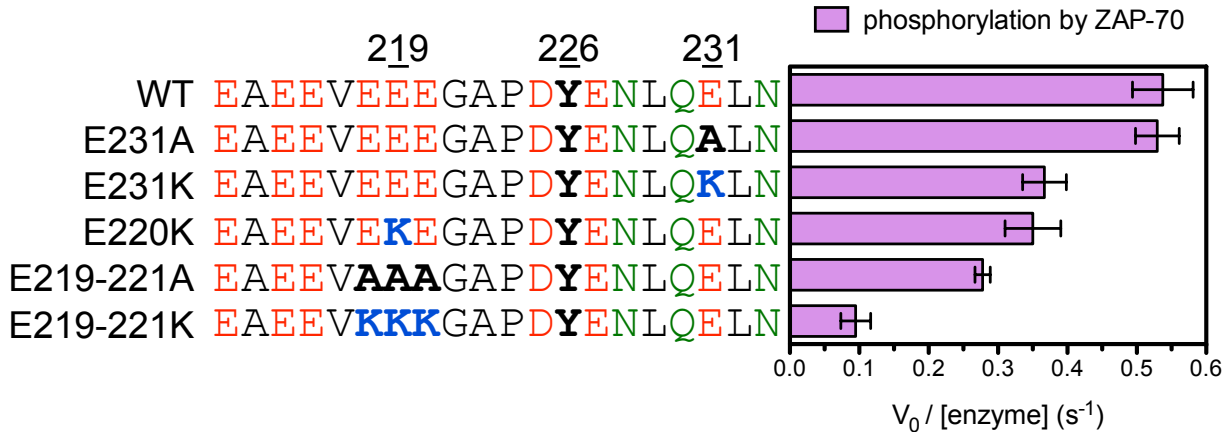

Supplement: supp [file elife-20105-supp-v1.zip › elife_poa_e20105_Figure_5_figure_supplement_2.pdf]

## Lck autophosphorylation

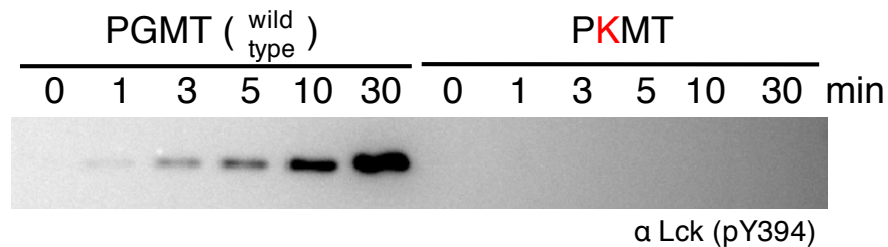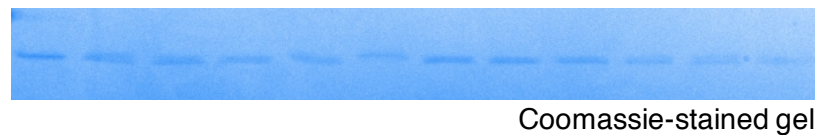

## c-Src autophosphorylation

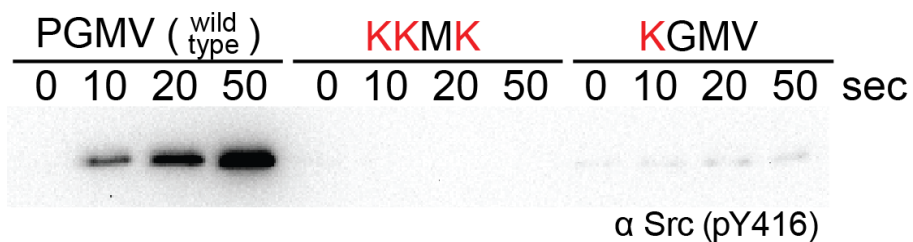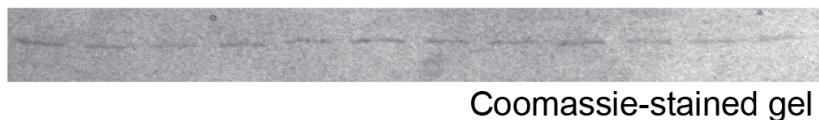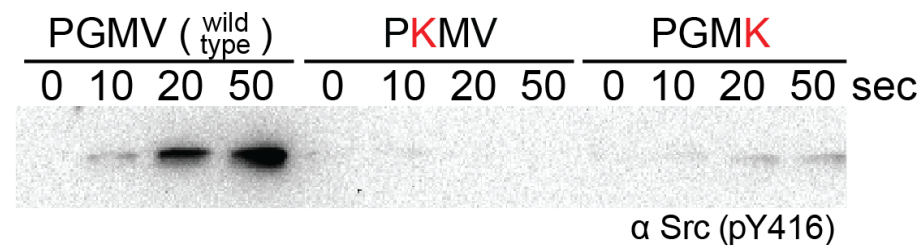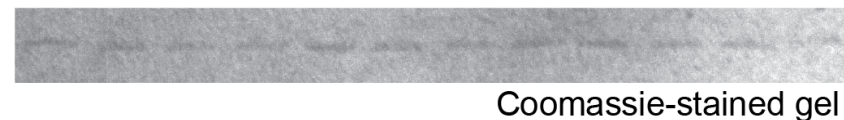

Supplement: supp [file elife-20105-supp-v1.zip › elife_poa_e20105_Figure_9_figure_supplement_2.pdf]

189 191

WT E S A E A S L D G S R E **Y** V N V S Q E L

R189A E S A E A S L D G S **A** E **Y** V N V S Q E L

R189D E S A E A S L D G S **D** E **Y** V N V S Q E L

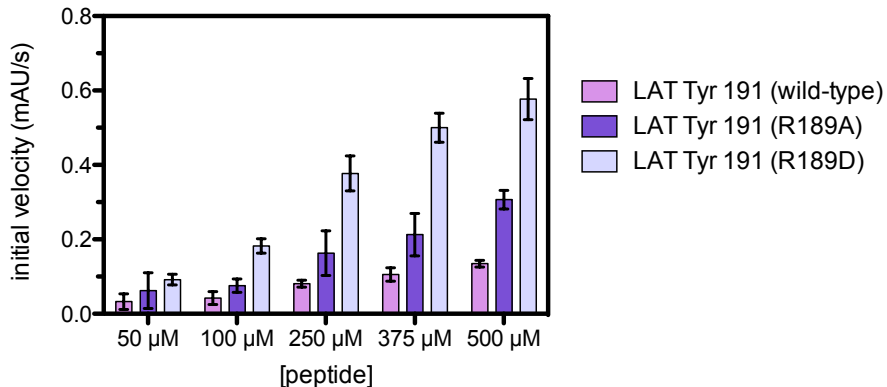

Supplement: supp [file elife-20105-supp-v1.zip › elife_poa_e20105_Figure_5_figure_supplement_3.pdf]
